# Supplementary material
Source: HighWire-hosted journal article supplement (https://bmjopen.bmj.com/content/12/7/e062154)
Supplement: inline-supplementary-material-1 [file inline-supplementary-material-1.pdf]

| #   | Query                                                                                                                                                                                                                                                                                                                                                                                                                                                                                                                                                                                                                                                                                                                                                                                                                       | Limiters/Expanders                                                                                                                       | Last Run Via                                                                                     |
|-----|-----------------------------------------------------------------------------------------------------------------------------------------------------------------------------------------------------------------------------------------------------------------------------------------------------------------------------------------------------------------------------------------------------------------------------------------------------------------------------------------------------------------------------------------------------------------------------------------------------------------------------------------------------------------------------------------------------------------------------------------------------------------------------------------------------------------------------|------------------------------------------------------------------------------------------------------------------------------------------|--------------------------------------------------------------------------------------------------|
| S16 | S14 not S15                                                                                                                                                                                                                                                                                                                                                                                                                                                                                                                                                                                                                                                                                                                                                                                                                 | Limiters - Published Date: 19970101-20221231; English Language<br>Expanders - Apply equivalent subjects<br>Search modes - Boolean/Phrase | Interface - EBSCOhost Research Databases<br>Search Screen - Advanced Search<br>Database - CINAHL |
| S15 | TI ( fetal or foetal or fetus or foetus or uterine or pre-natal or prenatal ) OR TI ( neonates or infants or newborn or child* or paediatric or pediatric or boys or girls )                                                                                                                                                                                                                                                                                                                                                                                                                                                                                                                                                                                                                                                | Expanders - Apply equivalent subjects<br>Search modes - Boolean/Phrase                                                                   | Interface - EBSCOhost Research Databases<br>Search Screen - Advanced Search<br>Database - CINAHL |
| S14 | S9 AND S12 AND S13                                                                                                                                                                                                                                                                                                                                                                                                                                                                                                                                                                                                                                                                                                                                                                                                          | Expanders - Apply equivalent subjects<br>Search modes - Boolean/Phrase                                                                   | Interface - EBSCOhost Research Databases<br>Search Screen - Advanced Search<br>Database - CINAHL |
| S13 | TI ( Usage or utilisation or utilization or efficacy or barriers or enablers or attitudes or evaluation ) OR AB ( Usage or utilisation or utilization or efficacy or barriers or enablers or attitudes or evaluation )                                                                                                                                                                                                                                                                                                                                                                                                                                                                                                                                                                                                      | Expanders - Apply equivalent subjects<br>Search modes - Boolean/Phrase                                                                   | Interface - EBSCOhost Research Databases<br>Search Screen - Advanced Search<br>Database - CINAHL |
| S12 | S10 OR S11                                                                                                                                                                                                                                                                                                                                                                                                                                                                                                                                                                                                                                                                                                                                                                                                                  | Expanders - Apply equivalent subjects<br>Search modes - Boolean/Phrase                                                                   | Interface - EBSCOhost Research Databases<br>Search Screen - Advanced Search<br>Database - CINAHL |
| S11 | TI (Track N2 Trigger system*) OR TI (deteriorating ward patient or vital sign monitoring or vital sign assessment or vital signs surveillance or (physiological signs N2 deterioration) or vital sign measurement or (rapid N2 response system) or (medical N2 response team) or critical care outreach team or clinically deteriorating patients or (detection N2 clinical deterioration)) OR AB (Track N2 Trigger system*) OR AB (deteriorating ward patient or vital sign monitoring or vital sign assessment or vital signs surveillance or (physiological signs N2 deterioration) or vital sign measurement or (rapid N2 response system) or (medical N2 response team) or critical care outreach team or clinically deteriorating patients or (detection N2 clinical deterioration)) OR AB (Track N2 Trigger system*) | Expanders - Apply equivalent subjects<br>Search modes - Boolean/Phrase                                                                   | Interface - EBSCOhost Research Databases<br>Search Screen - Advanced Search<br>Database - CINAHL |
| S10 | TI ( National Early Warning Score or NEWS ) OR AB ( National Early Warning Score or NEWS )                                                                                                                                                                                                                                                                                                                                                                                                                                                                                                                                                                                                                                                                                                                                  | Expanders - Apply equivalent subjects<br>Search modes - Boolean/Phrase                                                                   | Interface - EBSCOhost Research Databases<br>Search Screen - Advanced Search<br>Database - CINAHL |
| S9  | TI ( Acute setting* or Hospital or hospitals or level 2 patient* or level 3 patient* or ward clinician* or ward nurse* or acute nurs* ) OR AB ( Acute setting* or Hospital or hospitals or level 2 patient* or level 3 patient* or ward clinician* or ward nurse* or acute nurs* )                                                                                                                                                                                                                                                                                                                                                                                                                                                                                                                                          | Expanders - Apply equivalent subjects<br>Search modes - Boolean/Phrase                                                                   | Interface - EBSCOhost Research Databases<br>Search Screen - Advanced Search<br>Database - CINAHL |
| S8  | S6 not S7                                                                                                                                                                                                                                                                                                                                                                                                                                                                                                                                                                                                                                                                                                                                                                                                                   | Limiters - Published Date: 19970101-20221231; English Language<br>Expanders - Apply equivalent subjects<br>Search modes - Boolean/Phrase | Interface - EBSCOhost Research Databases<br>Search Screen - Advanced Search<br>Database - CINAHL |
| S7  | TI ( fetal or foetal or fetus or foetus or uterine or pre-natal or prenatal ) OR TI ( neonates or infants or newborn or child* or paediatric or pediatric or boys or girls )                                                                                                                                                                                                                                                                                                                                                                                                                                                                                                                                                                                                                                                | Expanders - Apply equivalent subjects<br>Search modes - Boolean/Phrase                                                                   | Interface - EBSCOhost Research Databases<br>Search Screen - Advanced Search<br>Database - CINAHL |
| S6  | S1 AND S4 AND S5                                                                                                                                                                                                                                                                                                                                                                                                                                                                                                                                                                                                                                                                                                                                                                                                            | Expanders - Apply equivalent subjects<br>Search modes - Boolean/Phrase                                                                   | Interface - EBSCOhost Research Databases<br>Search Screen - Advanced Search<br>Database - CINAHL |
| S5  | TI ( Usage or utilisation or utilization or efficacy or barriers or enablers or attitudes or evaluation ) OR AB ( Usage or utilisation or utilization or efficacy or barriers or enablers or attitudes or evaluation )                                                                                                                                                                                                                                                                                                                                                                                                                                                                                                                                                                                                      | Expanders - Apply equivalent subjects<br>Search modes - Boolean/Phrase                                                                   | Interface - EBSCOhost Research Databases<br>Search Screen - Advanced Search<br>Database - CINAHL |
| S4  | S2 OR S3                                                                                                                                                                                                                                                                                                                                                                                                                                                                                                                                                                                                                                                                                                                                                                                                                    | Expanders - Apply equivalent subjects<br>Search modes - Boolean/Phrase                                                                   | Interface - EBSCOhost Research Databases<br>Search Screen - Advanced Search<br>Database - CINAHL |
| S3  | TI (Track N2 Trigger system*) OR TI (deteriorating ward patient or vital sign monitoring or vital sign assessment or vital signs surveillance or (physiological signs N2 deterioration) or vital sign measurement or (rapid N2 response system) or (medical N2 response team) or critical care outreach team or clinically deteriorating patients or (detection N2 clinical deterioration)) OR AB (Track N2 Trigger system*) OR AB (deteriorating ward patient or vital sign monitoring or vital sign assessment or vital signs surveillance or (physiological signs N2 deterioration) or vital sign                                                                                                                                                                                                                        | Expanders - Apply equivalent subjects<br>Search modes - Boolean/Phrase                                                                   | Interface - EBSCOhost Research Databases<br>Search Screen - Advanced Search<br>Database - CINAHL |

|    |                                                                                                                                                                                                                                                                                    |                                                                        |                                                                                                  |
|----|------------------------------------------------------------------------------------------------------------------------------------------------------------------------------------------------------------------------------------------------------------------------------------|------------------------------------------------------------------------|--------------------------------------------------------------------------------------------------|
|    | measurement or (rapid N2 response system) or (medical N2 response team) or critical care outreach team or clinically deteriorating patients or (detection N2 clinical deterioration)) OR AB (Track N2 Trigger system*)                                                             |                                                                        |                                                                                                  |
| S2 | TI ( National Early Warning Score or NEWS ) OR AB ( National Early Warning Score or NEWS )                                                                                                                                                                                         | Expanders - Apply equivalent subjects<br>Search modes - Boolean/Phrase | Interface - EBSCOhost Research Databases<br>Search Screen - Advanced Search<br>Database - CINAHL |
| S1 | TI ( Acute setting* or Hospital or hospitals or level 2 patient* or level 3 patient* or ward clinician* or ward nurse* or acute nurs* ) OR AB ( Acute setting* or Hospital or hospitals or level 2 patient* or level 3 patient* or ward clinician* or ward nurse* or acute nurs* ) | Expanders - Apply equivalent subjects<br>Search modes - Boolean/Phrase | Interface - EBSCOhost Research Databases<br>Search Screen - Advanced Search<br>Database - CINAHL |
